# Supplementary material for: Multisystem Inflammation and Organ Dysfunction After BNT162b2 Messenger RNA Coronavirus Disease 2019 Vaccination
Source: PubMed Central journal article supplement — Crit Care Explor. 2021 Nov 5;3(11):e0578. doi: 10.1097/CCE.0000000000000578 (PMC8575416; doi:10.1097/cce.0000000000000578), 2021-11-05
Supplement: cc9-3-e0578-s001.pdf [file cc9-3-e0578-s001.pdf]

**Supplemental Materials for: Kahn B, et al. Multisystem Inflammation and Organ Dysfunction after BNT162b2 mRNA Covid-19 Vaccination**

**Appendices.**

Appendix A. Diagnostic studies and discussion

**Supplemental Tables**

eTable 1. Laboratory results

**Supplemental Figures**

eFigure 1. Suppurative folliculitis rash on face, chest, and back

eFigure 2. Immune cell profiling

eFigure 3. Brain MRI with multifocal ischemic strokes

## Appendices

### Appendix A. Diagnostic studies and discussion

#### *A1. Initial laboratory evaluation*

His initial laboratory evaluation was notable for white blood cell count  $21.9 \times 10^3/\text{uL}$  (ref: 4.5-13.5  $\times 10^3/\text{uL}$ ) with  $0.61 \times 10^3/\text{uL}$  absolute lymphocyte count (ref: 1.0-5.0  $\times 10^3/\text{uL}$ ) and  $19.8 \times 10^3/\text{uL}$  absolute neutrophil count (ref: 1.8-7.5  $\times 10^3/\text{uL}$ ), bicarbonate 24 mmol/L (ref: 22-32 mmol/L), creatinine 3.81 mg/dL (ref: 0.64-1.27 mg/dL), blood urea nitrogen 45 mg/dL (ref: 8-20 mg/dL), anion gap 16 (ref: 10-20), pH 7.33 (ref: 7.35-7.45), pCO<sub>2</sub> 51 mmHg (ref: 34-48 mmHg), lactic acid 2.6 mmol/L (ref: 0.5-1.26 mmol/L), albumin 5.0 g/dL (ref: 3.5-5.1 g/dL), and total bilirubin 1.7 mg/dL (ref: 0.3-1.2 mg/dL). Urinalysis showed packed red blood cells (ref: 0-2/high powered field) and protein >4000 mg/dL (ref: 0 mg/dL).

#### *A2. Inflammatory markers*

Expanded laboratory diagnostic evaluation was notable for a systemic dysregulated inflammatory process including: elevated high-sensitivity C-reactive protein (CRP) 138.3 mg/L (ref:  $\leq 7.4$  mg/L), non-cardiac CRP 2.50 mg/dL (ref:  $\leq 0.80$  mg/dL), erythrocyte sedimentation rate (ESR) 29 mm/h (ref: 0-20 mm/h), D-dimer 15.86 ug/mL (ref: 0-0.5), and lactate dehydrogenase (LDH) 204 U/L (ref: 98-192 U/L). Analysis of peripheral blood on hospital day (HD) 2 was notable for lymphopenia: CD3+ count 381/uL (ref: 900-3245/uL), CD4+ count 91/L (ref: 560-1840/L), CD8+ count 258/uL (ref: 260-1230/uL), and CD56+/16+/3- NK cells 112/uL (ref: 159-432/uL). An expanded cytokine panel on HD 8 demonstrated elevated soluble IL-2 receptor 2321.2 pg/mL (ref: 175.3-858.2 pg/mL), IL-10 11.2 pg/mL (ref:  $\leq 2.8$  pg/mL), IL-13 3.1 pg/mL (ref:  $\leq 2.3$  pg/mL), and IL-6 18.2 pg/mL (ref:  $\leq 2.0$  pg/mL). He had no elevation in IL-2, IL-4, IL-5, IL-12, IL-13, or IFN-gamma. He had elevated kappa free light chains of 42.8 mg/L (ref: 3.3-19.4 mg/L), but lambda free light chains, serum protein electrophoresis, and urine protein gel electrophoresis showed no evidence for paraprotein. He had a mildly elevated creatinine kinase of 584 U/L (ref: 49-397 U/L) that peaked at 833 U/L. Ferritin and free cortisol were normal. Triglycerides were elevated at 587 mg/dL (ref: 24-150 mg/dL).

#### *A3. Autoimmune serologies, malignancy evaluation, and clotting cascade testing*

An extensive serologic evaluation for autoimmune disease was negative including for anti-nuclear antibodies (ANA), anti-neutrophil cytoplasmic antibodies (ANCA) including PR-3 and MPO, C3, C4, anti-glomerular basement membrane antibodies, and anti-Scl-70 antibodies. Quantitative immunoglobulins were within normal limits.

Malignancy evaluation included peripheral flow cytometry notable only for lymphopenia, unremarkable pleural fluid cytology and flow cytometry, and computed tomography (CT) scan of the abdomen and pelvis without suspicious lesions.

He had mildly prolonged prothrombin time (PT) and activated partial thromboplastin time (aPTT), decreases in clotting factors II, VII, X, and XI, and an elevated dilute Russell's viper venom time of 50.5 seconds (ref: 28-42 seconds) which normalized later in the admission. All other hypercoagulable evaluation was unremarkable including beta-2-glycoprotein, cardiolipin antibodies, Factor V Leiden, ADAMTS13, anti-platelet factor 4 (PF4) antibodies (for heparin-

induced thrombocytopenia), lupus anticoagulant, antiphospholipid antibodies, fibrinogen, thrombin time, reptilase time, flow cytometry for paroxysmal nocturnal hemoglobinuria, and direct antiglobulin test (DAT).

MR angiogram of the head and neck on HD 8 was unremarkable and did not suggest central nervous system vasculitis as the source of ischemic foci.

#### *A4. Infectious disease testing*

Negative infectious disease testing included: blood and urine cultures; SARS-CoV-2 nucleic acid PCR three times and SARS-CoV-2 Nucleocapsid IgG; non-pandemic respiratory viruses; pleural fluid cultures; qualitative and quantitative human immunodeficiency virus (HIV); cerebrospinal fluid serologies and cultures; sexually transmitted infections; enteric pathogens; and systemic viral infections. An oral swab revealed rare Methicillin-Resistant *Staphylococcus aureus* consistent with colonization. Pericardial fluid culture grew *Cutibacterium* (*Propionibacterium*) *acnes* from broth only which was thought to be a skin contaminant. A skin punch biopsy on the upper chest revealed acute suppurative folliculitis with colonies of cocci and few focal yeast forms consistent with *Pityrosporum* species and consistent with an acneiform process. Skin culture was negative. Of note, the rash resolved quickly after beginning high-dose corticosteroids. The complete absence of fever and repeatedly negative testing for acute and prior SARS-CoV-2 infection was inconsistent with Multisystem Inflammatory Syndrome in Children (MIS-C) and in Adults (MIS-A).

#### *A5. Immune cell profiling*

On HD 3, the patient's whole blood was analyzed in a non-clinical, research-based cytometry by time of flight (CyTOF) assay. This analysis demonstrated a significantly expanded granulocytic population with concomitant relative lymphopenia more severe for CD4<sup>+</sup> cells, with an inverted CD4:CD8 ratio (**eFigures 2A, 2B, 2D**). A follow-up sample obtained on HD 7 revealed sustained lymphopenia but correction of the CD4:CD8 ratio led by expansion of a regulatory T-cell-like CD4<sup>+</sup> CD25<sup>+</sup> CD127<sup>-</sup> cell population (**eFigures 2A, 2B, 2C**). CyTOF analysis at both time points was notable for a high frequency of immature neutrophils (CD45<sup>+</sup> CD66b<sup>lo</sup> CD11c<sup>+</sup> CD14<sup>+</sup>), most likely reflecting demarginating granulocytes in the setting of high-dose glucocorticoids, and low B-cell expression of CD38 and HLA-DR (**eFigures 2D, 2E**).

#### *A6. Whole exome sequencing*

The patient's family history was notable for autoimmune hepatitis in his mother and rheumatoid arthritis in a maternal aunt. Rapid whole exome sequencing (XomeDxXpress, GeneDx) using search terms relevant to his clinical syndrome was initially non-diagnostic as no pathogenic or likely pathogenic variants were identified. Full exome analysis, however, revealed the presence of potentially relevant homozygous variants of uncertain significance in two genes: homozygous variants (c.-1G>T) in *C1S* and homozygous variants (c.1523 G>A; p.R508Q) in *SCNN1A*. Of note, his CH50 was present but low at 19.6 U/mL (ref: 38.7-89.9 U/mL) and notably drawn after the patient had undergone plasmapheresis. Mitochondrial DNA sequencing and deletion/duplication analysis was negative for pathogenic variants.

In summary, his whole exome sequencing revealed the presence of homozygous variants of uncertain significance in both the *C1S* and *SCNN1A* genes. *C1S* deficiency was considered due

to the reported phenotypes of autoimmune hepatitis (a diagnosis present in the patient's mother) and virus-associated hemophagocytic syndrome, but a non-zero CH50 level effectively ruled this out.<sup>1,2</sup> Hemophagocytic lymphohistiocytosis (HLH) was considered, but effectively ruled out by a normal serum ferritin. Comprehensive testing of the complement cascade revealed normal plasma levels of C1S, normal activity for both the classical and alternative pathways, and slightly decreased C4 (albeit only after plasma exchange), C5, and C8. A *SCNN1A*-related disorder was also considered. This can be associated with severe pseudohypoaldosteronism presenting early in life.<sup>3</sup> The patient had no known pre-existing kidney disease or electrolyte mishandling; in the hospital after vaccination he did have hyperkalemia that was difficult to control even with kidney replacement therapy. While other channelopathies are associated with hearing loss, *SCNN1A* gene variants have not been reported to be.<sup>4</sup> Of note, preliminary reports of a signal for hearing loss after Covid-19 vaccination have not been confirmed in large observational studies.<sup>5</sup>

#### *A7. Renal evaluation including kidney biopsy*

On admission, bladder ultrasound was notable only for mobile heterogeneous dependent material consistent with blood products. CT scan of the abdomen and pelvis without contrast demonstrated attenuation of the renal pelvises and ureters, consistent with the presence of blood products and hemorrhage, and no nephrolithiasis or hydroureteronephrosis. A 24-hour urine collection started on HD 4 contained 4.7 grams of protein.

Kidney biopsy: Two cores were obtained with an 18-gauge needle. Nine glomeruli were present. Light microscopy showed packed red blood cells in the tubules, but essentially normal-appearing glomeruli and only mild tubular injury. There was no significant interstitial fibrosis. Electron microscopy (EM) showed mild-moderate glomerular injury, with segmental foot process effacement involving approximately 30-40% of the capillary surface area. Endothelial cells showed frequent swelling and fenestration loss. No immune deposits were present on EM. Consistent with this, immunofluorescence was negative for IgG, IgA, IgM, C3, C1q, kappa, lambda, and fibrinogen. Immunofluorescence for COL4A5 to evaluate for collagen IV nephropathy/Alport syndrome showed a normal glomerular staining pattern.

#### *A8. Sensorineural hearing loss*

Otoscopic examination was unremarkable. CT scan of the head on HD 3 was unremarkable. Non-contrast magnetic resonance imaging (MRI) of the head on HD 5 revealed several punctate strokes in multifocal vascular territories of the bilateral hemispheres and the left cerebellum (**eFigure 3**), a distribution that did not explain the patient's hearing loss, and no labyrinthitis or evidence of prior labyrinthine insult or masses in the internal auditory canals. Lumbar puncture was notable for an opening pressure of 7 cmH<sub>2</sub>O (ref: 6-25 cmH<sub>2</sub>O) and cerebral spinal fluid glucose 85 mg/dL (ref: 40-70 mg/dL), otherwise unremarkable including extensive infectious studies. Since the patient was receiving treatment with glucocorticoids for his systemic inflammatory syndrome, no additional empiric treatment was used for hearing loss. Audiometry examination showed no response to pure tone or speech stimuli except for vibro-tactile responses consistent with a profound bilateral sensorineural hearing loss.

#### *A9. Ischemic strokes*

MR angiogram of the head and neck on HD 8 was unremarkable and did not suggest central nervous system vasculitis as the source of the ischemic foci. His pro-thrombotic evaluation was

unremarkable (**Appendix A3**) and he had no thrombosis found on four-extremity vascular ultrasonography. Follow-up MRI on HDs 10 and 21 showed no new infarcts and expected evolution of the previously noted punctate infarcts. His clinical neurological deficits remained limited to hearing loss.

## Supplemental Tables

**eTable 1. Laboratory results**

| Component                            | Hospital Day 1             | Reference range                    |
|--------------------------------------|----------------------------|------------------------------------|
| <b>Basic metabolic panel</b>         |                            |                                    |
| Glucose                              | 105 mg/dL                  | 70 - 99 mg/dL                      |
| Sodium                               | 135 mmol/L                 | 136 - 144 mmol/L                   |
| Potassium                            | 4.8 mmol/L                 | 3.6 - 5.1 mmol/L                   |
| Chloride                             | 95 mmol/L                  | 101 - 111 mmol/L                   |
| Bicarbonate                          | 24 mmol/L                  | 22 - 32 mmol/L                     |
| Anion gap                            | 16                         | 3 - 12                             |
| Blood urea nitrogen                  | 45 mg/dL                   | 8 - 20 mg/dL                       |
| Creatinine                           | 3.81 mg/dL                 | 0.64 - 1.27 mg/dL                  |
| Calcium                              | 10.2 mg/dL                 | 8.9 - 10.3 mg/dL                   |
| <b>Liver function panel</b>          |                            |                                    |
| Total protein                        | 8.4 g/dL                   | 6.1 - 7.9 g/dL                     |
| Albumin                              | 5 g/dL                     | 3.5 - 5.1 g/dL                     |
| Alanine aminotransferase (ALT)       | 48 U/L                     | 17 - 63 U/L                        |
| Aspartate aminotransferase (AST)     | 38 U/L                     | 15 - 41 U/L                        |
| Alkaline phosphatase                 | 85 U/L                     | 38 - 126 U/L                       |
| Total bilirubin                      | 1.7mg/dL                   | 0.3 - 1.2 mg/dL                    |
| Direct bilirubin                     | 0.4mg/dL                   | 0.1 - 0.5 mg/dL                    |
| Unconjugated bilirubin               | 1.3 mg/dL                  | 0.2 - 0.7 mg/dL                    |
| <b>Coagulation profile</b>           |                            |                                    |
| Prothrombin time (PT)                | 14.1 second(s)             | 9.4 - 12.5 second(s)               |
| International normalized ratio (INR) | 1.2                        | 0.8 - 1.1                          |
| Partial thromboplastin time (PTT)    | 32.6 second(s)             | 25.1 - 36.5 second(s)              |
| <b>Complete blood count</b>          |                            |                                    |
| White blood cells                    | 21.9 x 10 <sup>3</sup> /uL | 4.5 - 13.5 x 10 <sup>3</sup> /uL   |
| Red blood cells                      | 5.75 x 10 <sup>6</sup> /uL | 4.30 - 5.80 x 10 <sup>6</sup> /uLL |
| Hemoglobin                           | 16.6 g/dL                  | 13.5 - 17.5 g/dL                   |
| Hematocrit                           | 49%                        | 40 - 52 %                          |
| RDW                                  | 14%                        | 11.5 - 14.5 %                      |
| MCH                                  | 29 pg                      | 27 - 33 pg                         |
| MCHC                                 | 34 g/dL                    | 31 - 36 g/dL                       |
| MCV                                  | 86 fL                      | 80 - 100 fL                        |
| Platelets                            | 326 x 10 <sup>3</sup> /uL  | 150 - 400 x 10 <sup>3</sup> /uL    |
| <b>Acute phase reactants</b>         |                            |                                    |
| Lactate dehydrogenase (LDH)          | 204 U/L                    | 98 - 192 U/L                       |
| Haptoglobin                          | 132 mg/dL                  | 36 - 195 mg/dL                     |
| Erythrocyte sedimentation rate (ESR) | 29 mm/h                    | 0 - 20 mm/h                        |

**eTable 1. Laboratory results (cont.)**

| Acute phase reactants                                       | Hospital Day 2 | Hospital Day 10 | Hospital Day 11 | Hospital Day 12 | Hospital Day 13 | Hospital Day 15 | Hospital Day 18 | Hospital Day 21 | Hospital Day 39 |
|-------------------------------------------------------------|----------------|-----------------|-----------------|-----------------|-----------------|-----------------|-----------------|-----------------|-----------------|
| High-sensitivity C-reactive protein (CRP)<br>Ref: <7.4 mg/L | 138.3 (H)      | -               | -               |                 | -               | -               | 15.3 (H)        | -               | 13.1 (H)        |
| Erythrocyte sedimentation rate (ESR)<br>Ref: 0 - 20 mm/h    | 29 (H)         | 29 (H)          | -               | 1               | -               | -               | -               | -               | -               |
| Ferritin<br>Ref: 23.9 - 336.2 ng/mL                         | -              | 70.5            | -               | 240             | -               | -               | 132.3           | -               | -               |
| Non-cardiac CRP<br>Ref: ≤0.80 mg/dL                         | -              | 2.50 (H)        | -               | 1.70 (H)        | -               | -               | -               | 0.8             | -               |
| D-dimer<br>Ref: 0.00 - 0.50 ug/mL                           | -              | 15.86 (H)       | -               | 5.44 (H)        | -               | -               | 2.65 (H)        | -               | -               |
| Lactate dehydrogenase (LDH)<br>Ref: 98 - 192 U/L            | 204 (H)        | -               | 823 (H)         | 777 (H)         | 351 (H)         | 196 (H)         | -               | -               | -               |

| Hematologic and clotting assays                                        | Hospital Day 6 | Hospital Day 17 |
|------------------------------------------------------------------------|----------------|-----------------|
| Anticardiolipin IgG (GPL)<br>Ref: 0.0 - 11.0 unit(s)                   | 0.5            | -               |
| Anticardiolipin IgM (MPL)<br>Ref: 0.0 - 12.0 unit(s)                   | 3              | -               |
| Anti-beta-2 glycoprotein IgG<br>Ref: 0.0 - 7.9 unit(s)                 | 0.5            | -               |
| Anti-beta-2 glycoprotein IgM<br>Ref: 0.0 - 12.9 unit(s)                | 0.5            | -               |
| Tissue thromboplastin inhibitor<br>Ref: 0.0 - 1.4                      | 1.4            | -               |
| Dilute Russell's viper venom (DRVV) ratio<br>Ref: 0.0 - 1.1            | 1.4 (H)        | -               |
| Dilute Russell's viper venom (DRVV) time<br>Ref: 28.0 - 42.0 second(s) | 50.5 (H)       | 36.8            |
| ADAMTS13<br>Ref: ≥60 %                                                 | 61             | -               |
| Factor VIII<br>Ref: 50 - 200 %                                         | -              | 170             |
| Factor IX<br>Ref: 75 - 125 %                                           | -              | 101             |
| Factor XI<br>Ref: 60 - 140 %                                           | -              | 39 (L)          |

**eTable 1. Laboratory results (cont.)**

| <b>Serum protein electrophoresis (SPEP)</b> | <b>Hospital Day 2</b> |
|---------------------------------------------|-----------------------|
| Albumin<br>Ref: 3.5 - 5.8 g/dL              | 3.5                   |
| Alpha1-Globulin<br>Ref: 0.2 - 0.4 g/dL      | 0.4                   |
| Alpha2-Globulin<br>Ref: 0.5 - 0.8 g/dL      | 0.7                   |
| Beta-Globulin<br>Ref: 0.6 - 1.0 g/dL        | 0.9                   |
| Gamma-Globulin<br>Ref: 0.7 - 1.2 g/dL       | 0.8                   |

| <b>C-X-C Motif Chemokine Ligand 9 (CXCL9)</b> | <b>Hospital Day 23</b> | <b>Hospital Day 29</b> | <b>Hospital Day 48</b> | <b>Hospital Day 56</b> | <b>Hospital Day 63</b> |
|-----------------------------------------------|------------------------|------------------------|------------------------|------------------------|------------------------|
| CXCL9<br>Ref: ≤647 pg/mL                      | 2553 (H)               | 6227 (H)               | 3574 (H)               | 1728 (H)               | 1263 (H)               |



**eTable 1. Laboratory results (cont.)**

| Connective tissue disease serologies and cytology      | Value     |
|--------------------------------------------------------|-----------|
| Anti-glomerular basement membrane<br>Ref: 0 - 19 AU/mL | 0         |
| Anti-nuclear antibodies (ANA)<br>Ref: negative         | Negative  |
| Rheumatoid factor<br>Ref: ≤12.4 IU/mL                  | <7.0      |
| Anti-double stranded DNA<br>Ref: 0 - 99 IU/mL          | <10       |
| Anti-Scl-70<br>Ref: 0.0 - 0.9                          | 0         |
| Anti-serine protease 3<br>Ref: 0 - 20 unit(s)          | 3         |
| Anti-myeloperoxidase<br>Ref: 0 - 20 unit(s)            | 1         |
| Kappa free light chains<br>Ref: 3.3 - 19.4 mg/L        | 42.8 (H)  |
| Lambda free light chains<br>Ref: 5.7 - 26.3 mg/L       | 25.4      |
| Kappa:lambda ratio<br>Ref: 0.260 - 1.650               | 1.685 (H) |
| IgA<br>Ref: 50 - 500 mg/dL                             | 332       |
| IgG<br>Ref: 650 - 2,000 mg/dL                          | 863       |
| IgM<br>Ref: 40 - 270 mg/dL                             | 51        |
| CD3 lymphocyte %<br>Ref: 62 - 84 %                     | 47 (L)    |
| CD3 lymphocyte count<br>Ref: 900 - 3,245 /uL           | 381 (L)   |
| CD4 lymphocyte %<br>Ref: 32 - 56 %                     | 11 (L)    |
| CD4 lymphocyte count<br>Ref: 560 - 1,840 /uL           | 91 (L)    |
| CD8 lymphocyte %<br>Ref: 15 - 40 %                     | 32        |
| CD8 lymphocyte count<br>Ref: 260 - 1,230 /uL           | 258 (L)   |
| CD4/CD8 ratio<br>Ref: 0.9 - 3.4                        | 0.4 (L)   |
| Natural killer cell %<br>Ref: 6 - 30 %                 | 8         |
| Natural killer cell count<br>Ref: 159 - 432 /uL        | 112 (L)   |

**eTable 1. Laboratory results (cont.)**

| Cytokine panel #1                   | Hospital Day 8 |
|-------------------------------------|----------------|
| IL-2<br>Ref: ≤6.5 pg/mL             | <6.5           |
| IL-4<br>Ref: ≤1.5 pg/mL             | <1.5           |
| IL-6<br>Ref: ≤3.5 pg/mL             | 26.4 (H)       |
| IL-8<br>Ref: ≤10 pg/mL              | 32.4 (H)       |
| IL-10<br>Ref: ≤2.0 pg/mL            | <2.0           |
| IL-12<br>Ref: ≤2.5 pg/mL            | <2.5           |
| IL-13<br>Ref: ≤2.3 pg/mL            | <2.5           |
| Interferon Gamma<br>Ref: ≤6.5 pg/mL | <6.5           |
| TNF-alpha<br>Ref: ≤3.5 pg/mL        | 12.4 (H)       |

**eTable 1. Laboratory results (cont.)**

| Cytokine panel #2                         | Hospital Day 9 | Hospital Day 12 |
|-------------------------------------------|----------------|-----------------|
| IL-2<br>Ref: ≤2.1 pg/mL                   | <2.1           | -               |
| IL-2 Receptor<br>Ref: 175.3 - 858.2 pg/mL | 2431.0 (H)     | -               |
| IL-4<br>Ref: ≤2.2 pg/mL                   | <2.2           | -               |
| IL-5<br>Ref: ≤2.1 pg/mL                   | <2.1           | -               |
| IL-6<br>Ref: ≤2.0 pg/mL                   | -              | 4.4 (H)         |
| IL-10<br>Ref: ≤2.8 pg/mL                  | 14.3 (H)       | -               |
| IL-12<br>Ref: ≤1.9 pg/mL                  | <1.9           | -               |
| IL-13<br>Ref: ≤2.3 pg/mL                  | 3.6 (H)        | -               |
| Interferon Gamma<br>Ref: ≤4.2 pg/mL       | <4.2           | -               |

**eTable 1. Laboratory results (cont.)**

| <b>Complement factors</b>                                 | <b>Hospital Day 2</b> | <b>Hospital Day 13 (after plasma exchange)</b> | <b>Hospital Day 16 (after plasma exchange)</b> | <b>Hospital Day 27 (after plasma exchange)</b> |
|-----------------------------------------------------------|-----------------------|------------------------------------------------|------------------------------------------------|------------------------------------------------|
| C3<br>Ref: 88 - 201 mg/dL                                 | 106                   | 27 (L)                                         | 47 (L)                                         | -                                              |
| C4<br>Ref: 16 - 47 mg/dL                                  | 25                    | 6 (L)                                          | 12 (L)                                         | -                                              |
| Alternative Pathway (AH50)<br>Ref: 77 - 159 units/mL      | -                     | -                                              | -                                              | 87                                             |
| Classical Pathway<br>Ref: 176 - 362 units/mL              | -                     | -                                              | -                                              | 234                                            |
| C1 Esterase Inhibitor Function<br>Ref: 74-174 % of normal | -                     | -                                              | -                                              | 181 (H)                                        |
| C1 Esterase Inhibitor Level<br>Ref: 20-37 mg/dL           | -                     | -                                              | -                                              | 39 (H)                                         |
| C1 Function<br>Ref: 116373-264072 units/mL                | -                     | -                                              | -                                              | 168,346                                        |
| C1R level<br>Ref: 61-162 % of STD                         | -                     | -                                              | -                                              | 90                                             |
| C1S level<br>Ref: 59-297 % of STD                         | -                     | -                                              | -                                              | 123                                            |
| C1Q level<br>Ref: 83-125 mcg/mL                           | -                     | -                                              | -                                              | 90                                             |
| C2 level<br>Ref: 22.2-39.8 mcg/mL                         | -                     | -                                              | -                                              | 28.5                                           |
| C5 level<br>Ref: 55-113 mcg/mL                            | -                     | -                                              | -                                              | 44 (L)                                         |
| C6 level<br>Ref: 28-69 mcg/mL                             | -                     | -                                              | -                                              | 38                                             |
| C7 level<br>Ref: 35-96 mcg/mL                             | -                     | -                                              | -                                              | 56                                             |
| C8 level<br>Ref: 49-106 mcg/mL                            | -                     | -                                              | -                                              | 43 (L)                                         |
| C9 level<br>Ref: 33-95 mcg/mL                             | -                     | -                                              | -                                              | 83                                             |
| SC5b-9 (sMAC) level<br>Ref: 72-244 ng/dL                  | -                     | -                                              | -                                              | 264.4 (H)                                      |
| C1Q Autoantibody test<br>Ref: 0.0-7.0 % of STD            | -                     | -                                              | -                                              | 0.4                                            |

**Supplemental Figures**

**eFigure 1. Suppurative folliculitis rash on face, chest, and back**

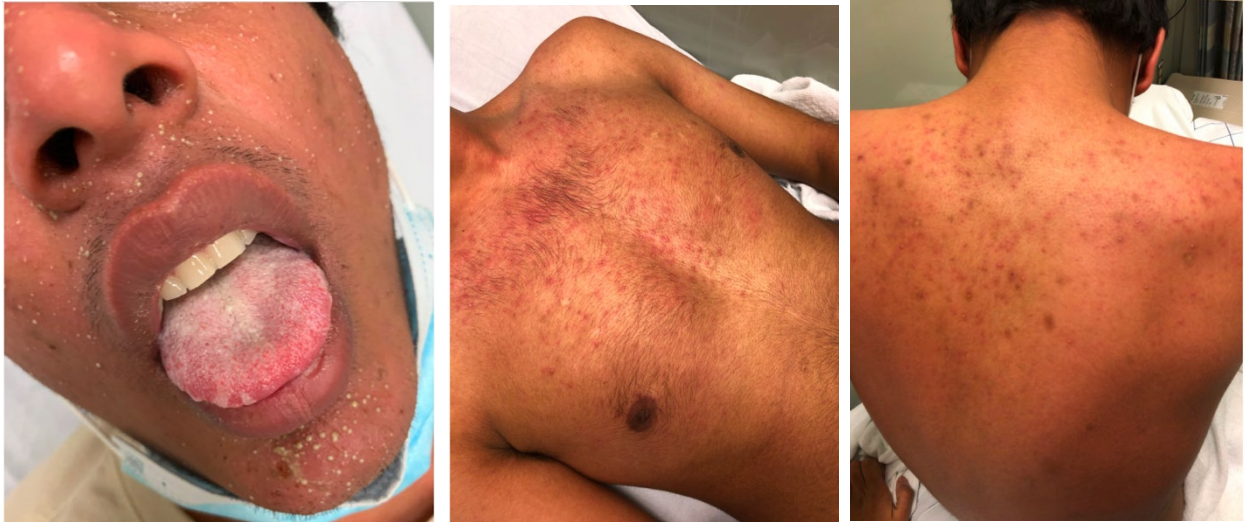

**eFigure 2. Immune cell profiling**

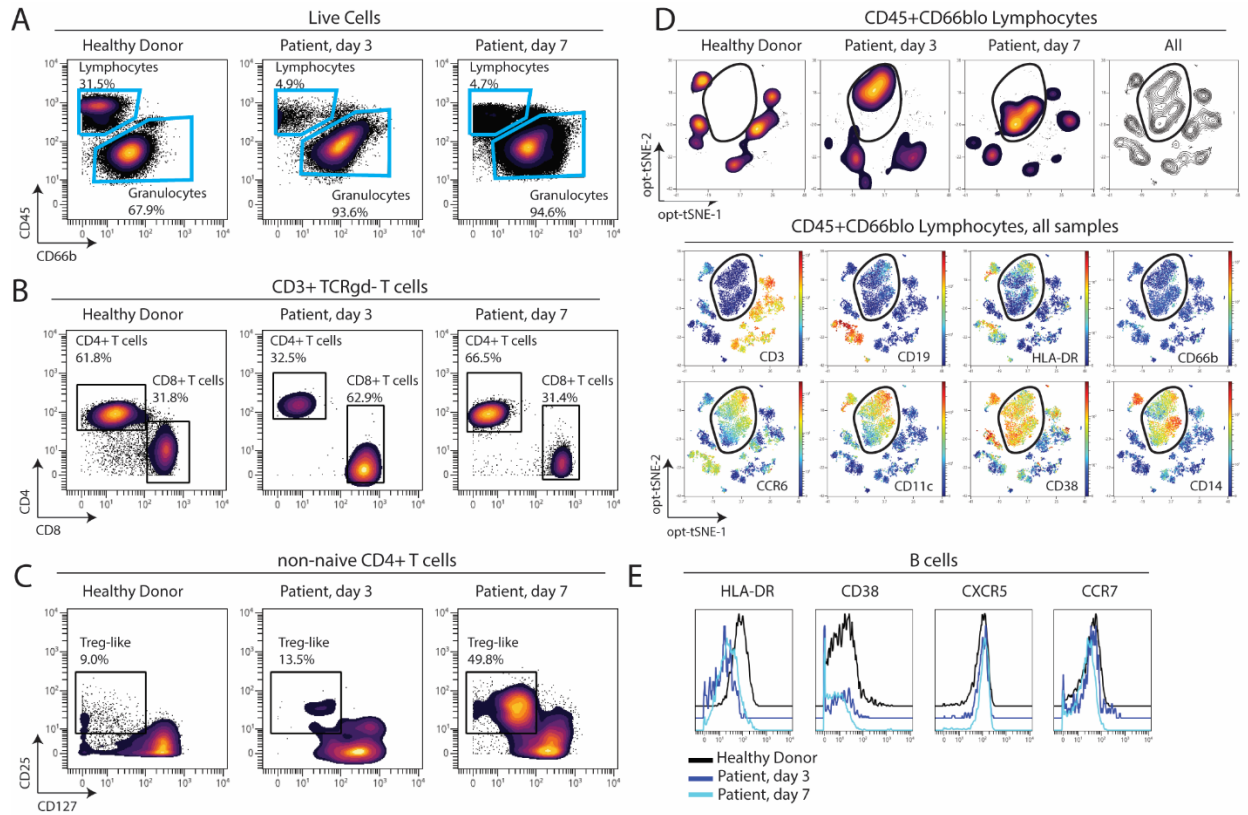

Immune cell profiling by cytometry by time of flight (CyTOF) demonstrated a significantly expanded granulocytic population with concomitant relative lymphopenia more severe for CD4+ cells, with an inverted CD4:CD8 ratio (**Figures 1A, 1B, 1D**). A follow-up sample obtained on hospital day 7 revealed sustained lymphopenia but correction of the CD4:CD8 ratio led by expansion of a regulatory T cell-like CD4+ CD25+ CD127- cell population (**Figures 1A, 1B, 1C**). CyTOF analysis at both time points was notable for a high frequency of immature neutrophils (CD45+ CD66b<sup>lo</sup> CD11c+ CD14+), most likely reflecting demarginating granulocytes in the setting of high-dose glucocorticoids, and low B-cell expression of CD38 and HLA-DR (**Figures 1D, 1E**).

eFigure 3. Brain MRI with multifocal ischemic strokes

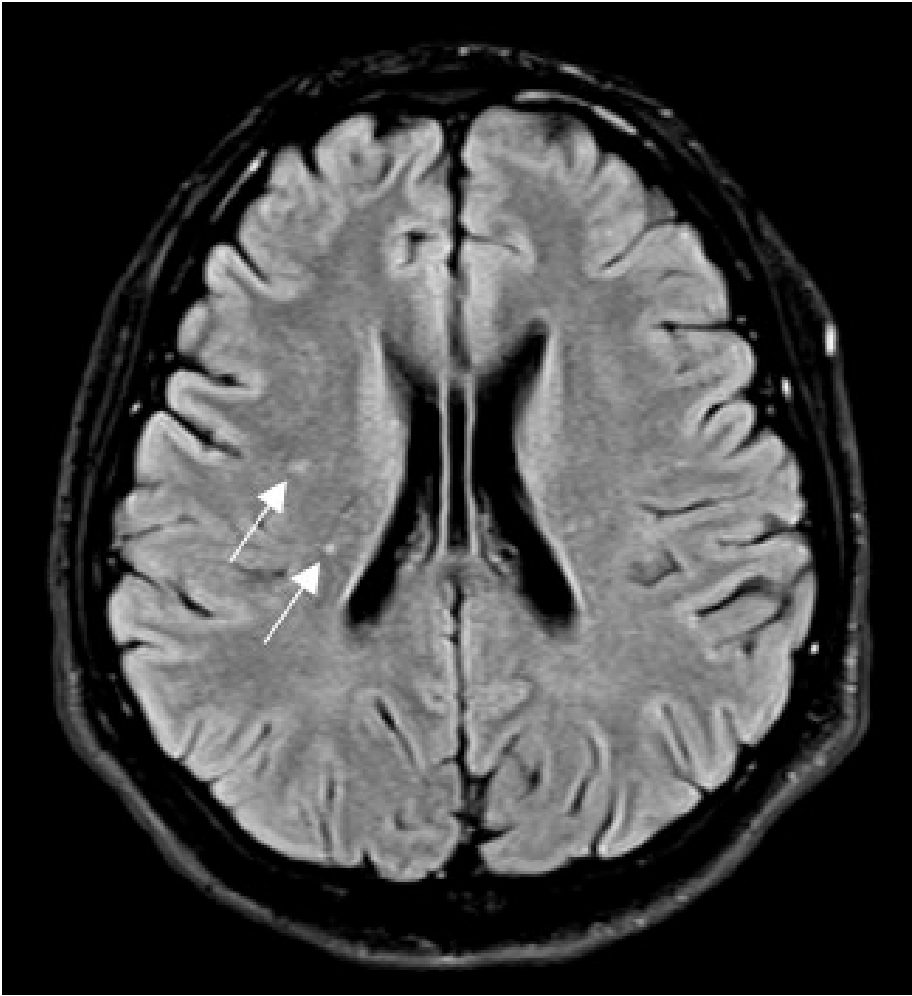

## Supplemental References

1. Dragon-Durey MA, Quartier P, Fremeaux-Bacchi V, et al. Molecular basis of a selective C1s deficiency associated with early onset multiple autoimmune diseases. *J Immunol* 2001;166:7612-6.
2. Endo Y, Kanno K, Takahashi M, Yamaguchi K, Kohno Y, Fujita T. Molecular basis of human complement C1s deficiency. *J Immunol* 1999;162:2180-3.
3. Hanukoglu I, Hanukoglu A. Epithelial sodium channel (ENaC) family: Phylogeny, structure-function, tissue distribution, and associated inherited diseases. *Gene* 2016;579:95-132.
4. Nie L. KCNQ4 mutations associated with nonsyndromic progressive sensorineural hearing loss. *Curr Opin Otolaryngol Head Neck Surg* 2008;16:441-4.
5. Formeister EJ, Chien W, Agrawal Y, Carey JP, Stewart CM, Sun DQ. Preliminary Analysis of Association Between COVID-19 Vaccination and Sudden Hearing Loss Using US Centers for Disease Control and Prevention Vaccine Adverse Events Reporting System Data. *JAMA Otolaryngol Head Neck Surg* 2021;147:674-6.
